# Supplementary material for: Enhanced tetrabromobisphenol A debromination by nanoscale zero valent iron particles sulfidated with S0 dissolved in ethanol
Source: Royal Society of Chemistry journal article supplement (doi:10.1039/d0em00375a), 2020-10-16
Supplement: d0em00375a1.pdf [file d0em00375a1.pdf]

*Supporting Information for*

**Enhanced Tetrabromobisphenol A Debromination by Nanoscale Zero Valent Iron**

**Particles Sulfidated with S<sup>0</sup> Dissolved in Ethanol**

Heli Wang<sup>a,b</sup>, Yin Zhong<sup>a,\*</sup>, Xifen Zhu<sup>a,b</sup>, Dan Li<sup>a,b,d</sup>, Yirong Deng<sup>a,b,e</sup>, Weilin Huang<sup>c</sup>, Ping'an Peng<sup>a</sup>

<sup>a</sup> State Key Laboratory of Organic Geochemistry, Guangdong Provincial Key Laboratory of Environmental Protection and Resources and Utilization, Guangdong-Hong Kong-Macao Joint Laboratory for Environmental Pollution and Control, Guangzhou Institute of Geochemistry, Chinese Academy of Sciences, Guangzhou 510640, China

<sup>b</sup>University of Chinese Academy of Sciences, Beijing 100049, China

<sup>c</sup>Department of Environmental Sciences, Rutgers, The State University of New Jersey, 14 College Farm Road, New Brunswick, NJ 08901 USA

<sup>d</sup>School of Environment and Civil Engineering, Dongguan University of Technology, Dongguan 523808, China

<sup>e</sup>Guangdong Key Laboratory of Contaminated Sites Environmental Management and Remediation, Guangdong Provincial Academy of Environmental Science, Guangzhou 510045, China

\*Corresponding author

State Key Laboratory of Organic Geochemistry

Guangzhou Institute of Geochemistry

Chinese Academy of Sciences

Wushan, Guangzhou 510640, China

Tel.: +86-20-85290142

Fax: +86-20-85290117

E-mail: [zhongyin@gig.ac.cn](mailto:zhongyin@gig.ac.cn)

## Summary

**Text S1.** List of chemicals and reagents.

**Fig. S1.** SEM micrographs and for S-nZVI<sup>S</sup> at different S/Fe molar ratios. (A) nZVI, (B) S/Fe = 0.025, (C) S/Fe = 0.25.

**Fig. S2.** The EDS spectra of nZVI and S-nZVI<sup>S</sup> at different S/Fe molar ratios. (A) nZVI, (B) S/Fe = 0.015; (C) S/Fe = 0.025; (D) S/Fe = 0.05; (E) S/Fe = 0.1; (F) S/Fe = 0.25.

**Fig. S3.** TEM images of fresh nZVI (A) and S-nZVI<sup>S</sup> at S/Fe of 0.25 (B).

**Fig. S4.** Detailed XPS survey of the region for S 2p for S-nZVI<sup>S</sup> at different S/Fe molar ratios. (A) nZVI; (B) S/Fe = 0.015; (C) S/Fe = 0.025; (D) S/Fe = 0.05; (E) S/Fe = 0.1; (F) S/Fe = 0.25.

**Fig. S5.** Detailed XPS survey of the region for Fe 2p<sub>3/2</sub> for S-nZVI<sup>S</sup> at different S/Fe molar ratios. (A) nZVI; (B) S/Fe = 0.015; (C) S/Fe = 0.025; (D) S/Fe = 0.05; (E) S/Fe = 0.1; (F) S/Fe = 0.25.

**Fig. S6.** Hydrodynamic diameter (A), zeta potential (B) and N<sub>2</sub>-BET specific surface area (C) of the S-nZVI<sup>S</sup> with different extents of sulfidation.

**Fig. S7.** H<sub>2</sub> evolution for S-nZVI<sup>S</sup> with different S/Fe molar ratios and fit to different models. The initial concentration of S-nZVI<sup>S</sup> was 2.3 g L<sup>-1</sup>. (A) Model 1. First-order passivation of Fe(0). (B) Model 2. Replacement of reactive phases. (C) Model 3. Advanced phase replacement model. (D) Model 4. Independent changes in two reactive phases.

**Fig S8.** Change in the pH value of reaction solution during the reaction of S-nZVI<sup>S-0.025</sup> with TBBPA. The initial concentration of S-nZVI<sup>S</sup> and TBBPA are 2.3 g L<sup>-1</sup> and 20 mg L<sup>-1</sup>, respectively.

**Fig. S9.** Effect of S/Fe molar ratio on the transformation of TBBPA by S-nZVI<sup>S</sup>. Lines are pseudo-first order fittings of data points. The initial concentration of S-nZVI<sup>S</sup> and TBBPA were 2.3 g L<sup>-1</sup> and 20 mg L<sup>-1</sup>, respectively.

**Fig. S10.** Proposed debromination pathways of TBBPA by nZVI and S-nZVI<sup>S</sup> with different S/Fe molar ratios.

**Fig. S11.** Transformation kinetics of TBBPA by S-nZVI<sup>Na<sub>2</sub>S</sup> and S-nZVI<sup>Na<sub>2</sub>S<sub>2</sub>O<sub>4</sub></sup>. The solid lines represent the simulated curves based on the pseudo-first-order reaction kinetic model. The initial concentration of S-nZVI particles and TBBPA are 2.3 g L<sup>-1</sup> and 20 mg L<sup>-1</sup>, respectively.

**Fig. S12.** Detailed XPS survey of the region for Fe 2p<sub>3/2</sub> (A, B) and S 2p (C, D) from S-nZVI<sup>Na<sub>2</sub>S<sub>2</sub>O<sub>4</sub>-0.5</sup> (A, C) and S-nZVI<sup>Na<sub>2</sub>S-0.025</sup> (B, D).

**Fig. S13.** Transformation kinetics of TBBPA by S-nZVI<sup>S-0.025</sup>(S-) under different real waters. The solid lines represent the simulated curves based on the pseudo-first-order reaction kinetic model. The initial concentration of S-nZVI<sup>S-0.025</sup> particles and TBBPA are 2.3 g L<sup>-1</sup> and 5 mg L<sup>-1</sup>, respectively.

**Table S1.** Binding energy and relative peak area of XPS peaks of Fe(2p<sub>3/2</sub>) and S(2p<sub>3/2</sub>) elements on the surface of nZVI and S-nZVI<sup>S</sup> samples

**Table S2.** Theoretical and actual S/Fe and relative atomic percentage of Fe, S, O, and C of S-nZVI<sup>S</sup> at different S/Fe molar ratios.

**Table S3.** Summary of parameters obtained from fitting HER data with the First-order passivation of Fe<sup>0</sup> model with *k* as global.

**Table S4.** Summary of parameters obtained from fitting HER data to the Replacement of reactive phases model.

**Table S5.** Summary of parameters obtained from fitting HER data to the Advanced phase replacement model.

**Table S6.** Summary of parameters obtained from fitting HER data to the Independent changes in two reactive phases.

**Table S7.** Parameters of Tafel Curves for nZVI and S-nZVI<sup>S</sup>.

**Table S8.** Parameters of cyclic voltammetry curves for nZVI and S-nZVI<sup>S</sup>.

**Table S9.** Pseudo first-order rate constants ( $k_{\text{obs}}$ ) for TBBPA removal by S-nZVI<sup>S</sup>.

**Table S10.** Physicochemical properties of water samples.

**Text S1.** List of chemicals and reagents.

TBBPA standard (97%), bisphenol A (BPA) standard (99%) were purchased from Alfa Aesar (Ward Hill, USA). The standards of debromination products (i.e., tri-BBPA, di-BBPA, mono-BBPA) are synthesized in Dr. Zhiqiang Yu's of Guangzhou Institute of Geochemistry, Chinese Academy of Sciences. Ferrous chloride tetrahydrate ( $\text{FeCl}_2 \cdot 4\text{H}_2\text{O}$ , 99.5%-101.0%), sublimed sulfur (S, 99.5%) and concentrated HCl (guaranteed reagent, 37%, w/w) were obtained from Guangzhou Chemical Reagents Factory (Guangzhou, China). Sodium borohydride ( $\text{NaBH}_4$ , 98%) were purchased from Sinopharm Chemical Reagent Co., Ltd (Shanghai, China). Ethanol (AR, 99.7%) was supplied by Shanghai Titan Scientific Co.,Ltd. HPLC-grade methanol was obtained from Merck (Darmstadt, Germany). Ultra high purity compressed nitrogen gas was purchased from Foshan MS Messer Gas Co.,Ltd (Guangzhou, China). The ultrapure water (resistivity: 18.2  $\text{M}\Omega \text{ cm}$ ) was deoxygenated with high purity nitrogen (99.999%) for 40 min and was then taken into anaerobic chamber to prepare aqueous solutions.

**Fig. S1.** SEM micrographs and for S-nZVI<sup>s</sup> at different S/Fe molar ratios. (A) nZVI, (B) S/Fe = 0.025, (C) S/Fe = 0.25.

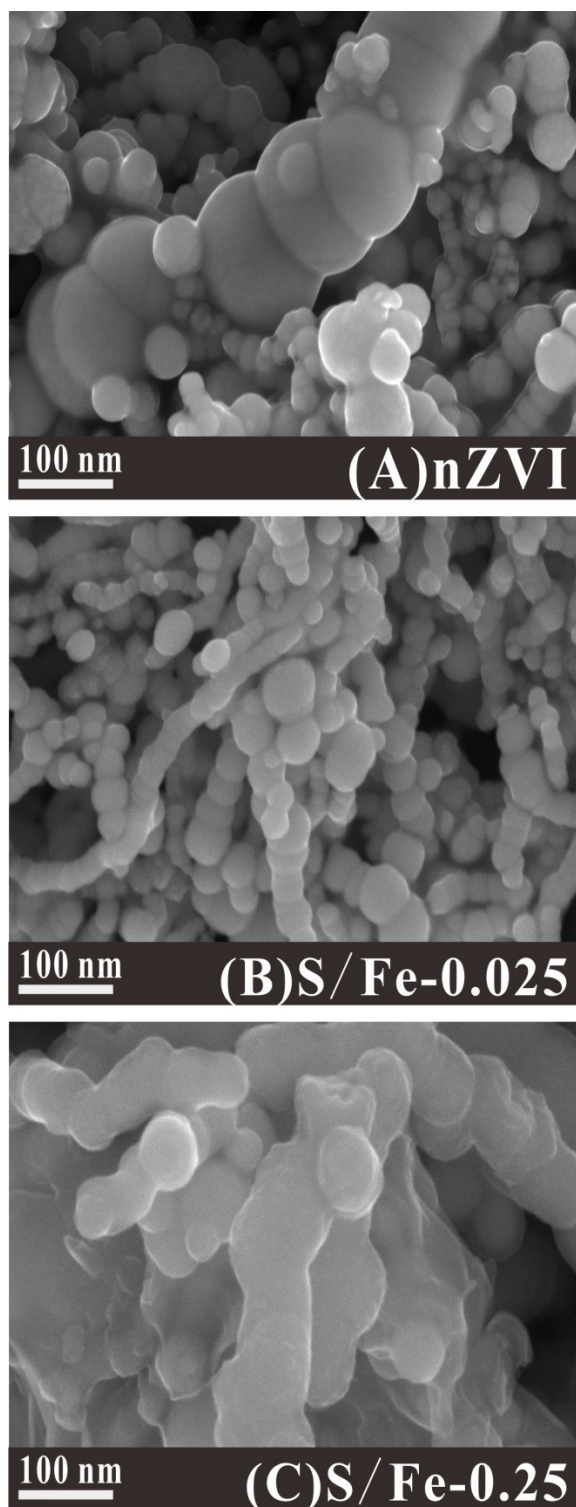

**Fig. S2.** The EDS spectra of nZVI and S-nZVI<sup>S</sup> at different S/Fe molar ratios. (A) nZVI, (B) S/Fe = 0.015; (C) S/Fe = 0.025; (D) S/Fe = 0.05; (E) S/Fe = 0.1; (F) S/Fe = 0.25.

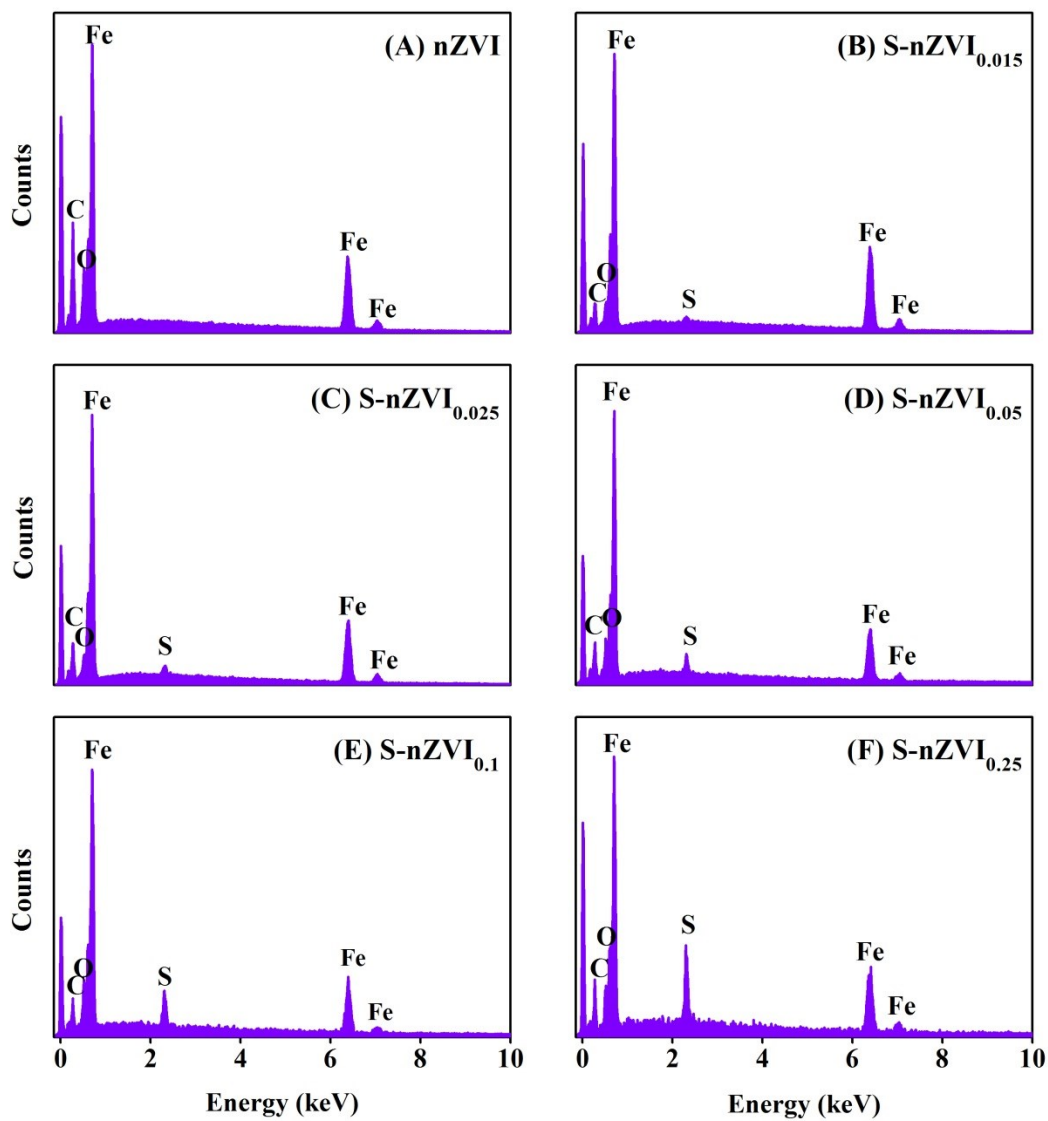

**Fig. S3.** TEM images of freshly prepared nZVI (A) and S-nZVI<sup>S</sup> at S/Fe of 0.25 (B).

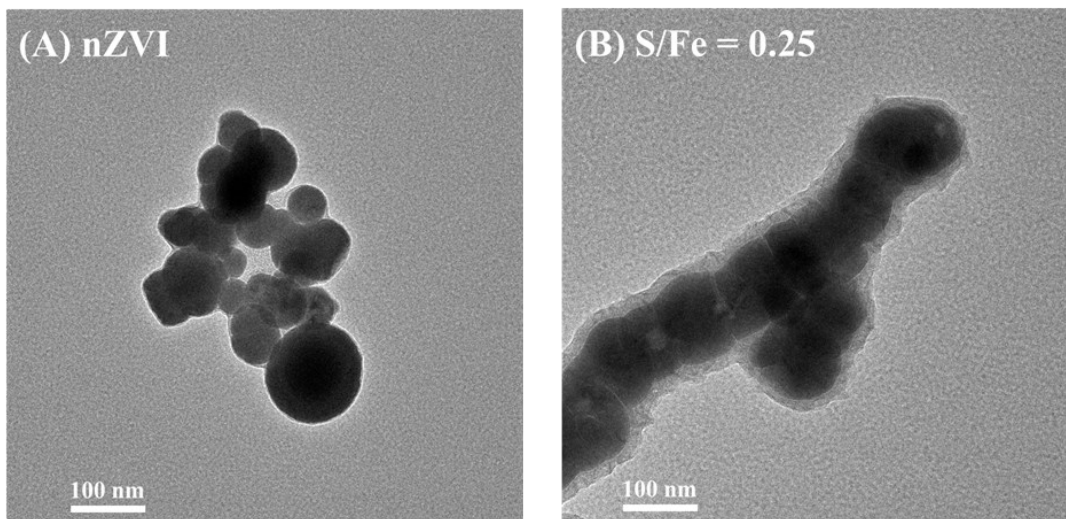



**Fig. S4.** Detailed XPS survey of the region for S 2p for S-nZVI<sup>S</sup> at different S/Fe molar ratios.

(A) nZVI; (B) S/Fe = 0.015; (C) S/Fe = 0.025; (D) S/Fe = 0.05; (E) S/Fe = 0.1; (F) S/Fe = 0.25.

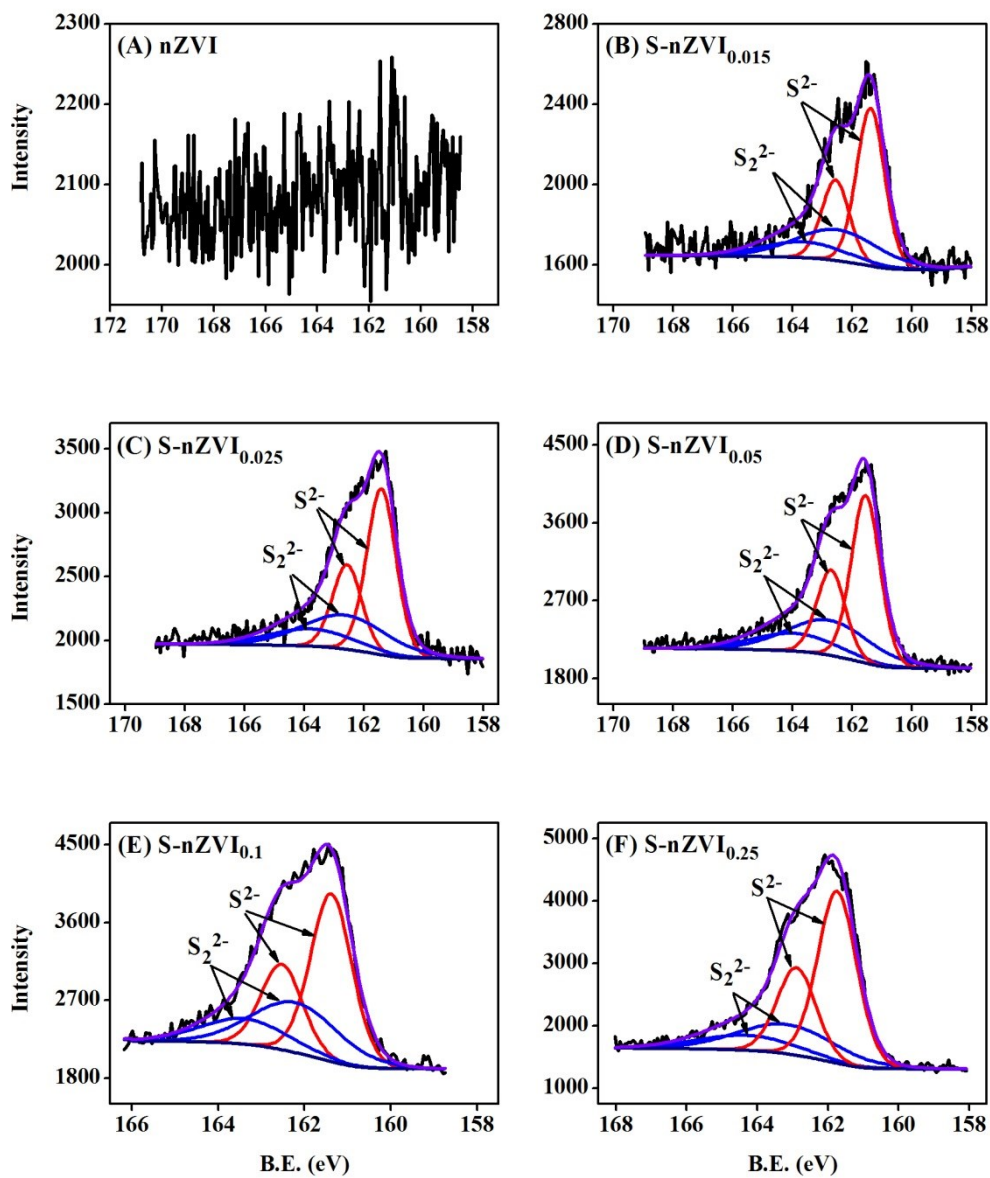

**Fig. S5.** Detailed XPS survey of the region for Fe 2p<sub>3/2</sub> for S-nZVI<sup>S</sup> at different S/Fe molar ratios.

(A) nZVI; (B) S/Fe = 0.015; (C) S/Fe = 0.025; (D) S/Fe = 0.05; (E) S/Fe = 0.1; (F) S/Fe = 0.25.

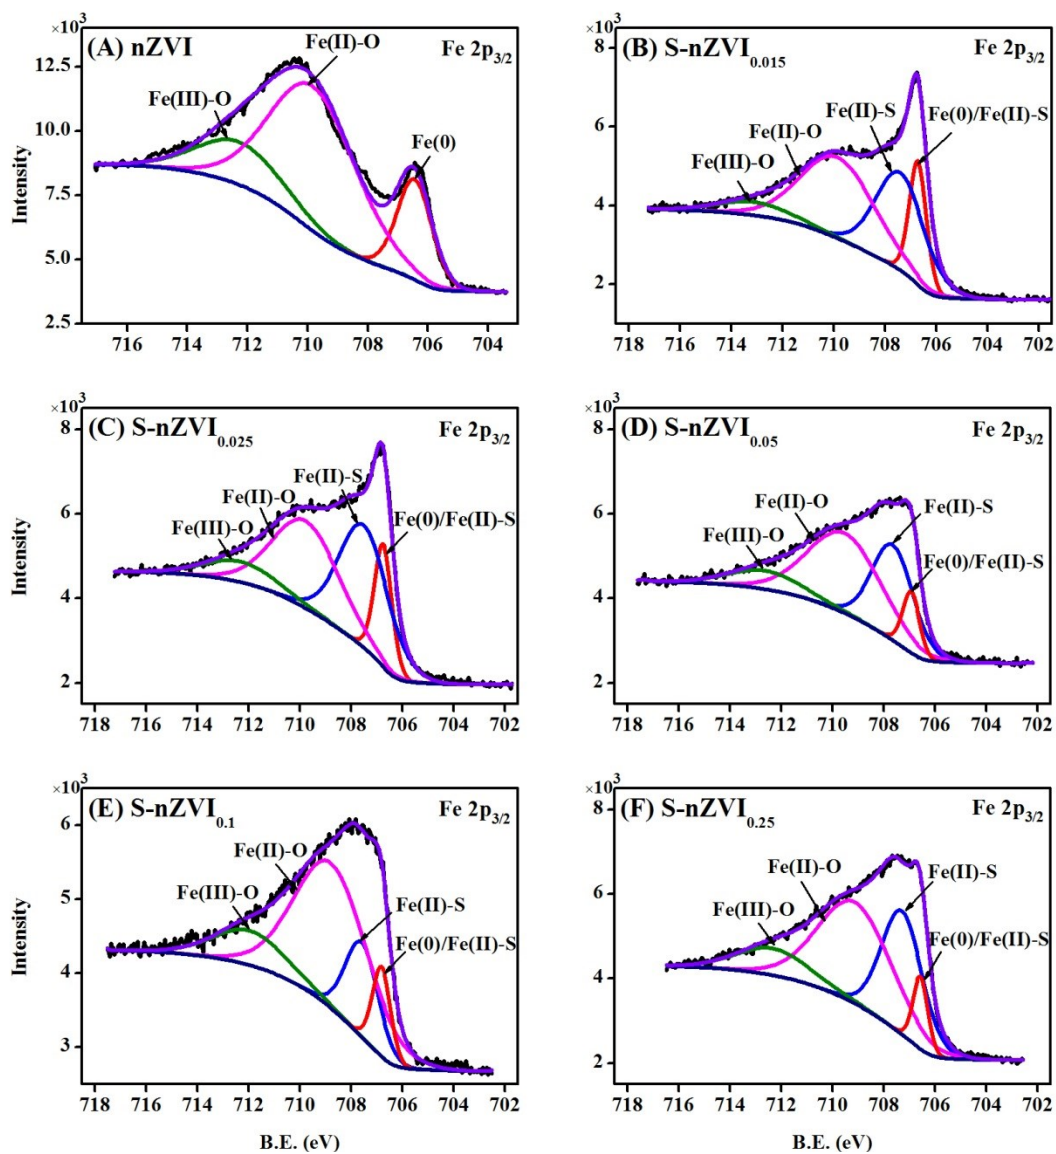

**Fig. S6.** Hydrodynamic diameter (A), zeta potential (B) and N<sub>2</sub>-BET specific surface area (C) of the S-nZVI<sup>S</sup> with different extents of sulfidation.

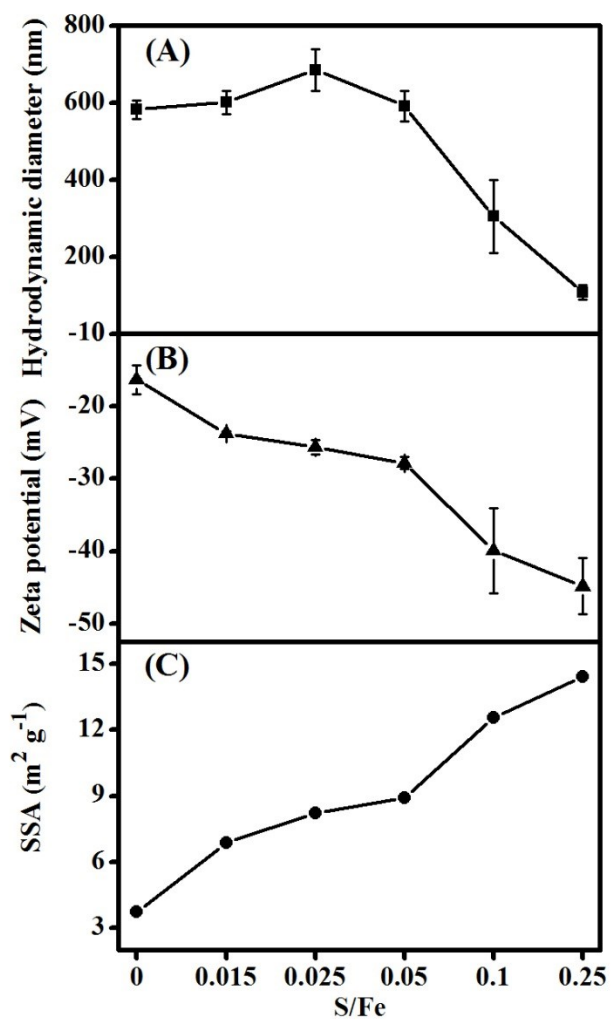

**Fig S7.** H<sub>2</sub> evolution for S-nZVIS with different S/Fe molar ratios and fit to different models.

The initial concentration of S-nZVIS was 2.3 g L<sup>-1</sup>. (A) First-order passivation of Fe(0) model; (B) Replacement of reactive phases model; (C) Advanced phase replacement model; (D) Independent changes in two reactive phases model.

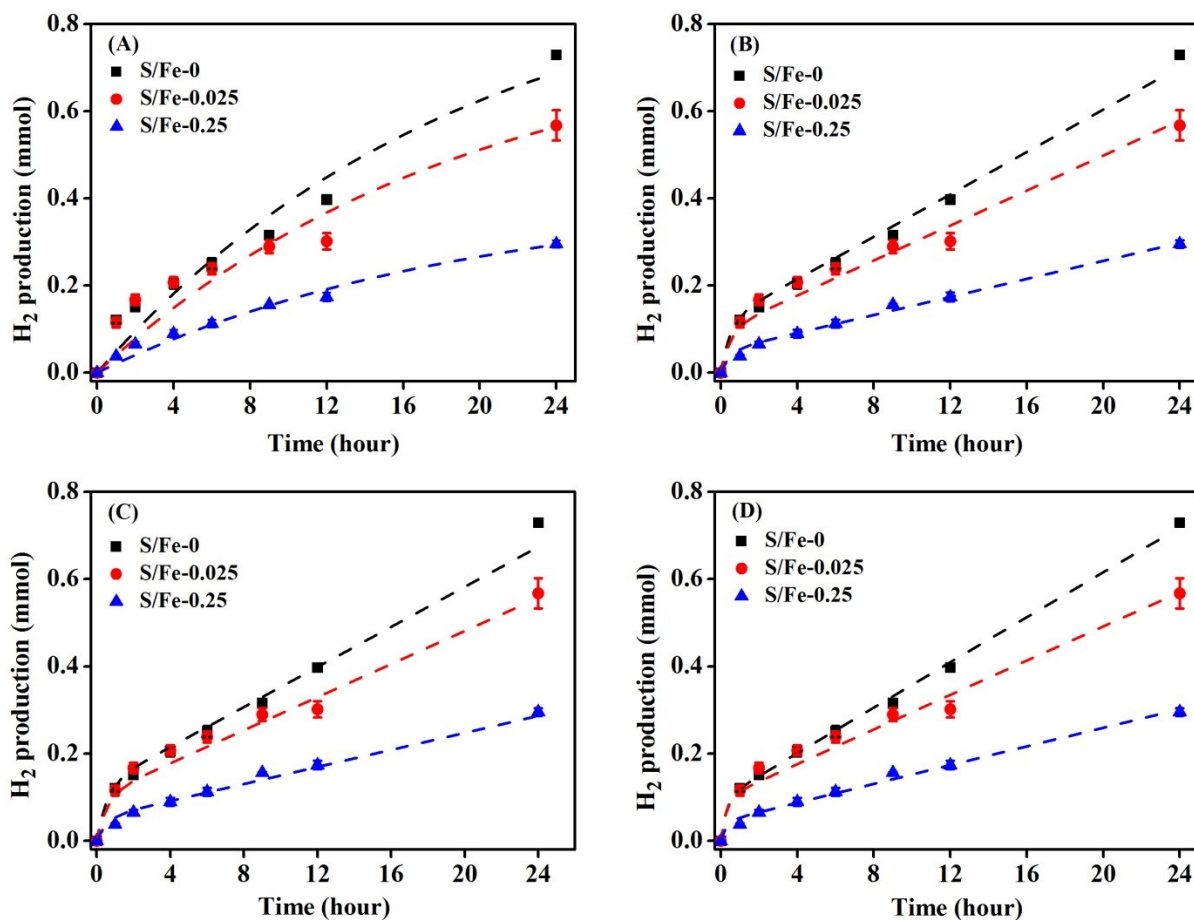

**Fig. S8.** Change in the pH value of reaction solution during the reaction of S-nZVI<sup>S-0.025</sup> with TBBPA. The initial concentration of S-nZVI<sup>S</sup> and TBBPA are 2.3 g L<sup>-1</sup> and 20 mg L<sup>-1</sup>, respectively.

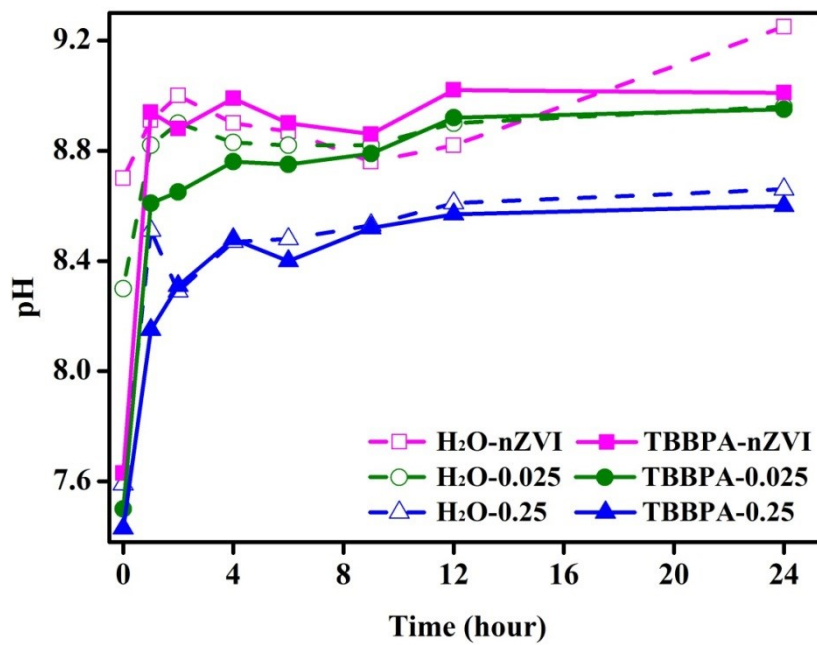

**Fig S9.** Effect of S/Fe molar ratio on the transformation of TBBPA by S-nZVI<sup>S</sup>. Lines are pseudo-first order fittings of data points. The initial concentration of S-nZVI<sup>S</sup> and TBBPA were 2.3 g L<sup>-1</sup> and 20 mg L<sup>-1</sup>, respectively.

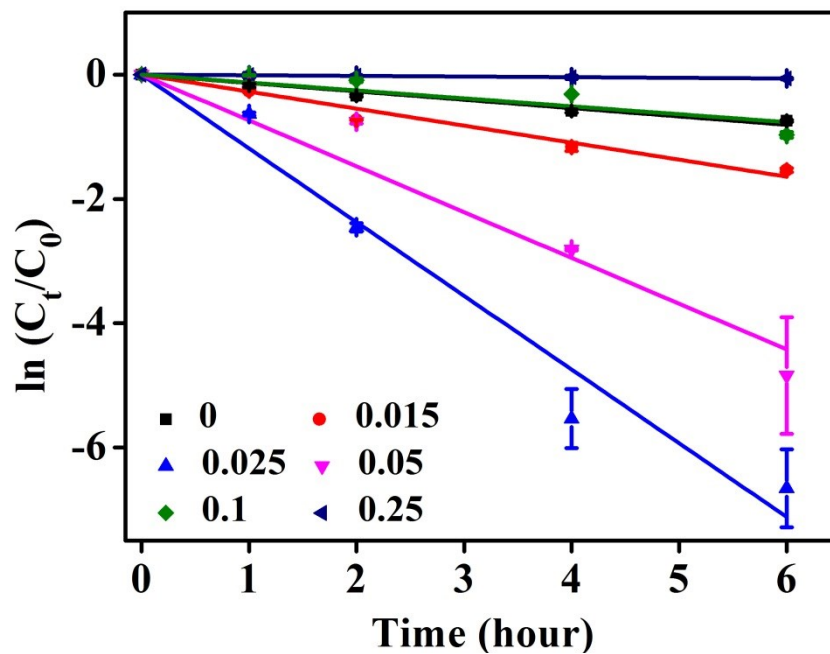

**Fig. S10.** Proposed debromination pathways of TBBPA by nZVI and S-nZVI<sup>S</sup> with different S/Fe molar ratios.

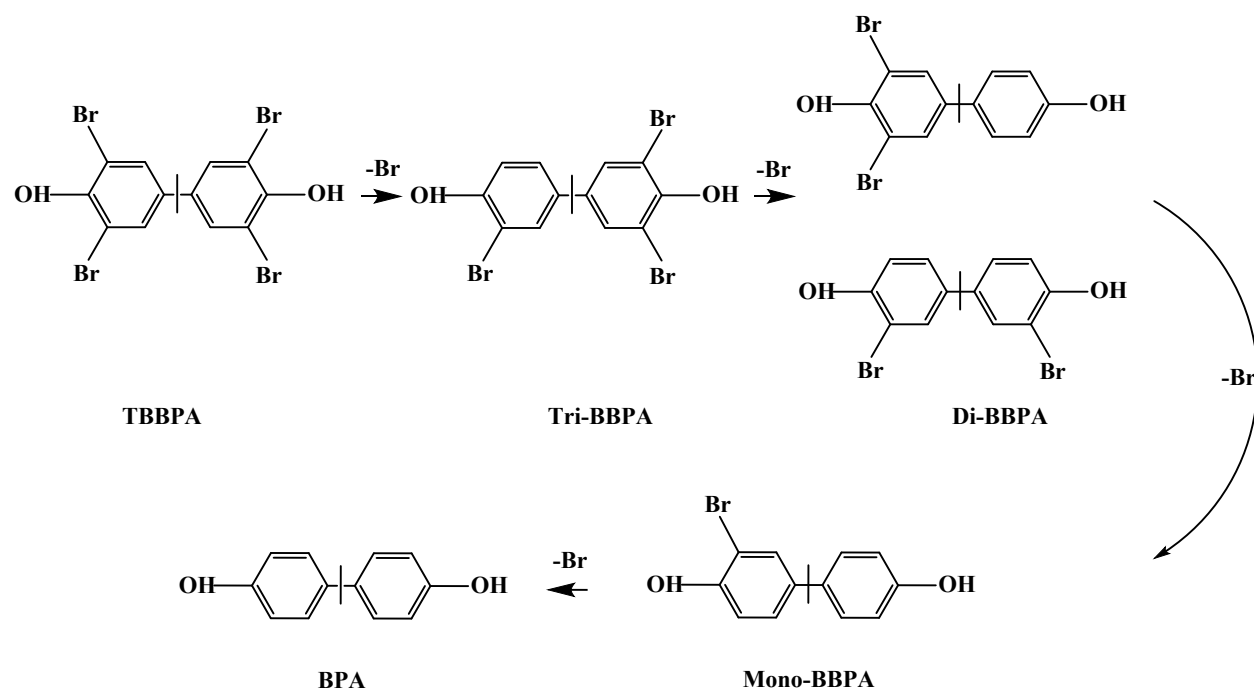

**Fig. S11.** Transformation kinetics of TBBPA by S-nZVI<sup>Na<sub>2</sub>S</sup> and S-nZVI<sup>Na<sub>2</sub>S<sub>2</sub>O<sub>4</sub></sup>. The solid lines represent the simulated curves based on the pseudo-first-order reaction kinetic model. The initial concentration of S-nZVI particles and TBBPA are 2.3 g L<sup>-1</sup> and 20 mg L<sup>-1</sup>, respectively.

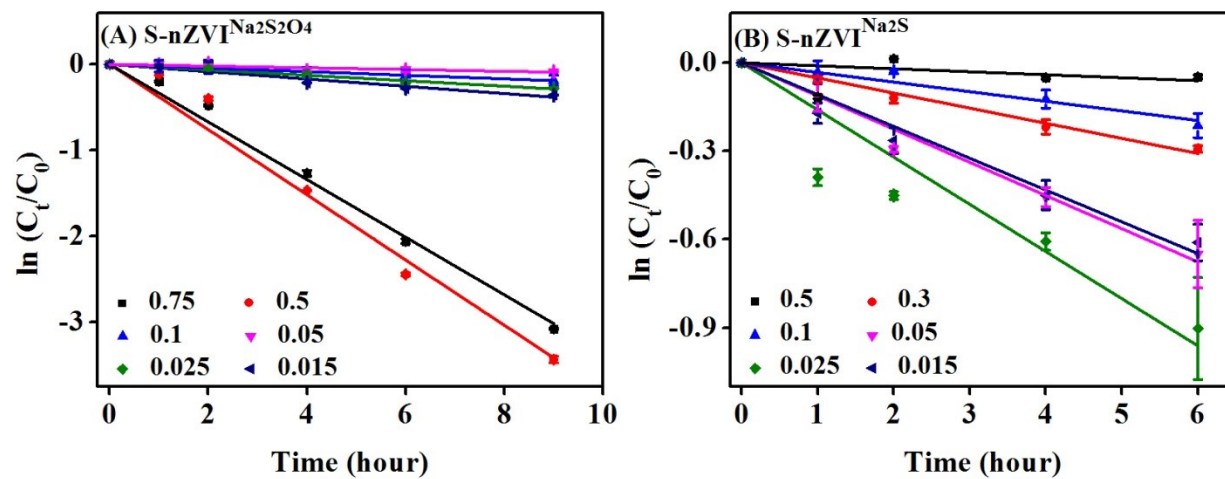



**Fig. S12.** Detailed XPS survey of the region for Fe 2p<sub>3/2</sub> (A, B) and S 2p (C, D) from S-nZVI<sup>H2O</sup><sub>Na<sub>2</sub>S<sub>2</sub>O<sub>4</sub>-0.5</sub> (A, C) and S-nZVI<sup>H2O</sup><sub>Na<sub>2</sub>S-0.025</sub> (B, D).

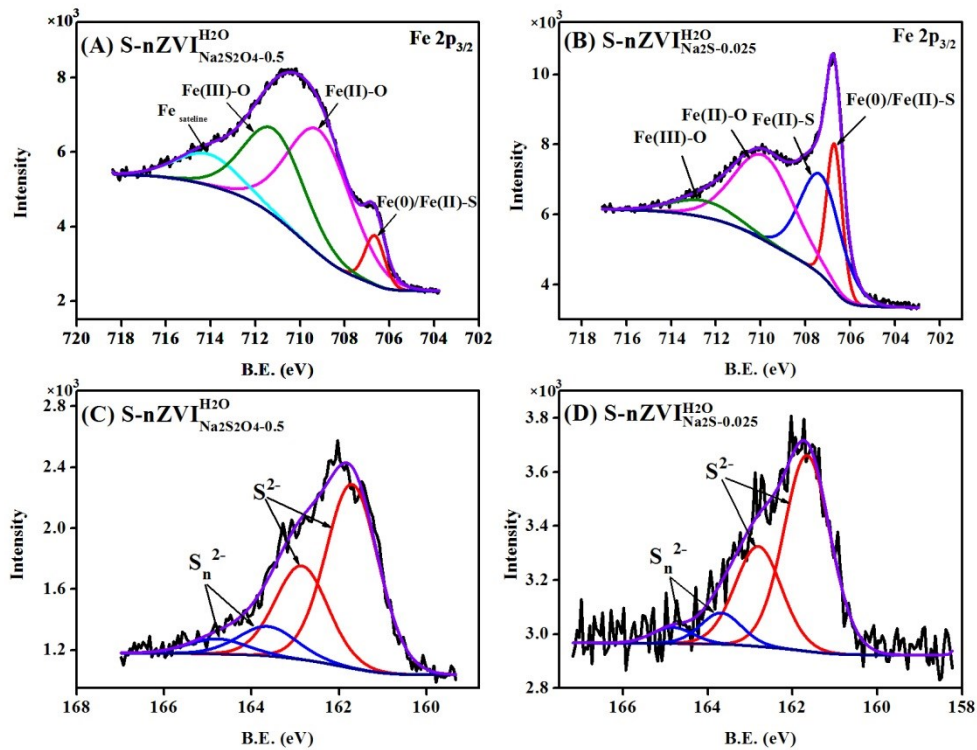

**Fig. S13.** Transformation kinetics of TBBPA by S-nZVI<sup>S-0.025</sup>(S-) under different real waters .

The solid lines represent the simulated curves based on the pseudo-first-order reaction kinetic model. The initial concentration of S-nZVI<sup>S-0.025</sup> particles and TBBPA are 2.3 g L<sup>-1</sup> and 5 mg L<sup>-1</sup>, respectively.

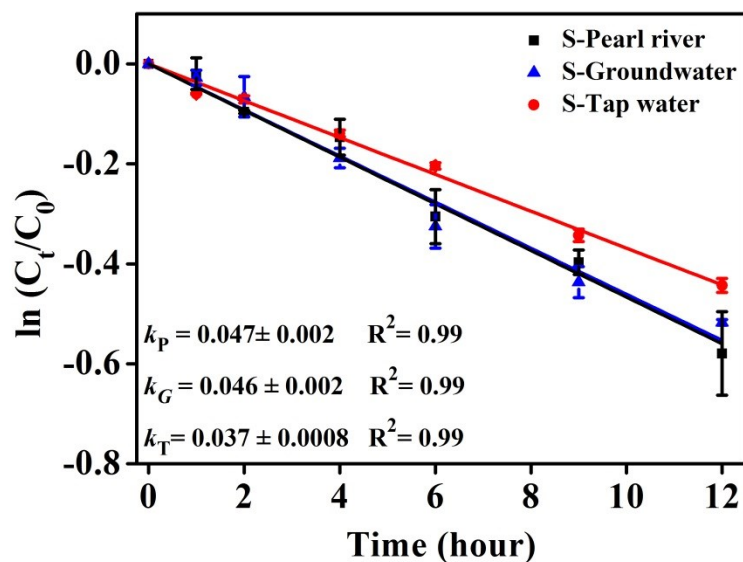

**Table S1.** Binding energy and relative peak area of XPS peaks of Fe(2p<sub>3/2</sub>) and S(2p<sub>3/2</sub>) elements on the surface of nZVI and S-nZVI<sup>S</sup> samples

| Sample       |                        | Species                      | B.E (eV)                     | Relative peak area (%) |       |
|--------------|------------------------|------------------------------|------------------------------|------------------------|-------|
| nZVI         | Fe(2p <sub>3/2</sub> ) | Fe <sup>0</sup>              | 706.5                        | 16.94                  |       |
|              |                        | Fe(II)-O                     | 710.1                        | 63.32                  |       |
|              |                        | Fe(III)-O                    | 713.5                        | 19.74                  |       |
| S-nZVI-0.015 | Fe(2p <sub>3/2</sub> ) | Fe <sup>0</sup> / Fe(II)-S   | 706.7                        | 15.68                  |       |
|              |                        | Fe(II)-S                     | 707.4                        | 34.29                  |       |
|              |                        | Fe(II)-O                     | 709.8                        | 43.22                  |       |
|              |                        | Fe(III)-O                    | 712.9                        | 6.81                   |       |
|              |                        | S(2p <sub>3/2</sub> )        | S <sup>2-</sup>              | 161.4                  | 62.42 |
| S-nZVI-0.025 | Fe(2p <sub>3/2</sub> ) | S <sub>2</sub> <sup>2-</sup> | 162.5                        | 37.58                  |       |
|              |                        | Fe <sup>0</sup> / Fe(II)-S   | 706.8                        | 16.57                  |       |
|              |                        | Fe(II)-S                     | 707.6                        | 37.63                  |       |
|              |                        | Fe(II)-O                     | 709.8                        | 36.30                  |       |
|              |                        | Fe(III)-O                    | 712.6                        | 9.50                   |       |
|              |                        | S(2p <sub>3/2</sub> )        | S <sup>2-</sup>              | 161.4                  | 62.65 |
|              |                        |                              | S <sub>2</sub> <sup>2-</sup> | 162.6                  | 37.35 |
| S-nZVI-0.05  | Fe(2p <sub>3/2</sub> ) | Fe <sup>0</sup> / Fe(II)-S   | 706.9                        | 8.09                   |       |
|              |                        | Fe(II)-S                     | 707.6                        | 30.45                  |       |
|              |                        | Fe(II)-O                     | 709.4                        | 49.54                  |       |
|              |                        | Fe(III)-O                    | 712.5                        | 11.92                  |       |

| Sample                | Species                      | B.E (eV)                     | Relative peak area (%) |       |
|-----------------------|------------------------------|------------------------------|------------------------|-------|
| S-nZVI-0.05           | S(2p <sub>3/2</sub> )        | S <sup>2-</sup>              | 161.6                  | 61.60 |
|                       |                              | S <sub>2</sub> <sup>2-</sup> | 162.8                  | 38.40 |
|                       |                              | Fe <sup>0</sup> / Fe(II)-S   | 706.8                  | 7.97  |
| S-nZVI-0.1            | Fe(2p <sub>3/2</sub> )       | Fe(II)-S                     | 707.6                  | 18.07 |
|                       |                              | Fe(II)-O                     | 708.8                  | 59.99 |
|                       |                              | Fe(III)-O                    | 712.0                  | 13.97 |
|                       |                              | Fe <sup>0</sup> / Fe(II)-S   | 706.6                  | 6.82  |
| S-nZVI-0.25           | S(2p <sub>3/2</sub> )        | S <sup>2-</sup>              | 161.4                  | 60.09 |
|                       |                              | S <sub>2</sub> <sup>2-</sup> | 162.4                  | 39.91 |
|                       | Fe(2p <sub>3/2</sub> )       | Fe(II)-S                     | 707.3                  | 30.59 |
|                       |                              | Fe(II)-O                     | 709.0                  | 49.24 |
|                       |                              | Fe(III)-O                    | 712.2                  | 13.35 |
|                       |                              | Fe <sup>0</sup> / Fe(II)-S   | 706.6                  | 6.82  |
| S(2p <sub>3/2</sub> ) | S <sup>2-</sup>              | 161.7                        | 69.56                  |       |
|                       | S <sub>2</sub> <sup>2-</sup> | 163.1                        | 30.44                  |       |

**Table S2.** Theoretical and actual S/Fe and relative atomic percentage of Fe, S, O, and C of S-nZVI<sup>S</sup> at different S/Fe molar ratios.

| Theoretical S/Fe | Actual S/Fe | Atomic ratio (%) |      |      |       |
|------------------|-------------|------------------|------|------|-------|
|                  |             | Fe               | S    | O    | C     |
| 0                | 0           | 62.69            | N    | 4.89 | 32.42 |
| 0.015            | 0.012       | 83.39            | 1.01 | 3.21 | 12.39 |
| 0.025            | 0.023       | 68.41            | 1.62 | 3.30 | 26.68 |
| 0.05             | 0.038       | 60.17            | 2.31 | 5.80 | 31.71 |
| 0.1              | 0.07        | 72.18            | 5.06 | 5.42 | 17.33 |
| 0.25             | 0.13        | 62.91            | 8.25 | 6.47 | 22.37 |

N: Not detectable

**Table S3.** Summary of parameters obtained from fitting HER data with the First-order passivation of Fe<sup>0</sup> model with  $k$  as global.

| S/Fe  | A (mmol)    | $k$ (h <sup>-1</sup> ) | Reduced $\chi^2$ | $R^2$ |
|-------|-------------|------------------------|------------------|-------|
| 0     | 0.96 ± 0.15 | 0.05 ± 0.01            | 0.002            | 0.94  |
| 0.025 | 0.79 ± 0.12 |                        |                  |       |
| 0.25  | 0.41 ± 0.08 |                        |                  |       |

**Table S4.** Summary of parameters obtained from fitting HER data with the Replacement of reactive phases model with  $k_{\text{H}_2,1}/k_{\text{H}_2,2}$  and  $k$  as global.

| S/Fe  | $k_{\text{H}_2,1}/k_{\text{H}_2,2}$ | $S_{1,0} \cdot k_{\text{H}_2,2}$ (mmol · h <sup>-1</sup> ) | $k$ (h <sup>-1</sup> ) | Reduced $\chi^2$ | $R^2$ |
|-------|-------------------------------------|------------------------------------------------------------|------------------------|------------------|-------|
| 0     | 10.86 ± 4.57                        | 0.02 ± 8.54E-4                                             | 2.04 ± 1.06            | 3.34E-4          | 0.99  |
| 0.025 |                                     | 0.02 ± 7.5E-4                                              |                        |                  |       |
| 0.25  |                                     | 0.01 ± 5.53E-4                                             |                        |                  |       |

**Table S5.** Summary of parameters obtained from fitting HER data with the Advanced phase replacement model with  $k_1$  and  $k_2$  as global.

| S/Fe  | $k_{\text{H}_2,1}/k_{\text{H}_2,2}$ | $S_{1,0} \cdot k_{\text{H}_2,2}$ (mmol · h <sup>-1</sup> ) | $k_1$ (h <sup>-1</sup> ) | $k_2$ (h <sup>-1</sup> ) | Reduced $\chi^2$ | $R^2$ |
|-------|-------------------------------------|------------------------------------------------------------|--------------------------|--------------------------|------------------|-------|
| 0     | 9.61 ± 4.31                         | 0.02 ± 0.005                                               | 1.80 ± 1.18              | 1E-4 ± 0.01              | 4.42E-4          | 0.99  |
| 0.025 |                                     | 0.02 ± 0.004                                               |                          |                          |                  |       |
| 0.25  |                                     | 0.01 ± 0.002                                               |                          |                          |                  |       |

**Table S6.** Summary of parameters obtained from fitting HER data with the Independent changes in two reactive phases with  $k_1$  and  $k_2$  as global.

| S/Fe  | A (mmol)      | $k_1$ (h <sup>-1</sup> ) | B (mmol)       | $k_2$ (h <sup>-1</sup> ) | Reduced $\chi^2$ | $R^2$ |
|-------|---------------|--------------------------|----------------|--------------------------|------------------|-------|
| 0     | 0.096 ± 0.017 | 3.38 ± 5.24              | 19.77 ± 131.95 | 0.001 ± 0.01             | 3.05E-4          | 0.99  |
| 0.025 | 0.096 ± 0.015 |                          | 15.05 ± 100.41 |                          |                  |       |
| 0.25  | 0.044 ± 0.012 |                          | 8.20 ± 54.73   |                          |                  |       |

**Table S7.** Performance parameters of Tafel Curves for nZVI and S-nZVI<sup>S</sup>.

| S/Fe ratio                                             | 0    | 0.025 | 0.25 |
|--------------------------------------------------------|------|-------|------|
| $E_{\text{corr}}$ (mV)                                 | -754 | -899  | -882 |
| $I_{\text{corr}}$ ( $\mu\text{A}\cdot\text{cm}^{-2}$ ) | 0.98 | 12.47 | 1.76 |
| $b_{\text{c}}$ (V/dec)                                 | 0.23 | 0.11  | 0.12 |
| $b_{\text{a}}$ (V/dec)                                 | 0.17 | 0.10  | 0.09 |
| $R_{\text{p}}$ ( $10^4\Omega\cdot\text{cm}^2$ )        | 4.62 | 0.18  | 1.27 |



**Table S8.** Parameters of cyclic voltammetry curves for nZVI and S-nZVI<sup>S</sup>.

| S/Fe ratios                                          | 0     | 0.025  | 0.25   |
|------------------------------------------------------|-------|--------|--------|
| Anode potential (mV)                                 | -62   | -48    | -42    |
| Cathode potential (mV)                               | -368  | -411   | -385   |
| Potential difference $\Delta V$ (mV)                 | -306  | -363   | -343   |
| Mid-point potential (mV)                             | -215  | -229.5 | -213.5 |
| Anode current ( $\mu\text{A}\cdot\text{cm}^{-2}$ )   | 2.04  | 7.56   | 2.32   |
| Cathode current ( $\mu\text{A}\cdot\text{cm}^{-2}$ ) | -3.13 | -13.45 | -6.45  |

**Table S9.** Pseudo first-order rate constants ( $k_{\text{obs}}$ ) for TBBPA removal by S-nZVI<sup>S</sup>.

| Samples                                                          | $k_{\text{obs}}$ (h <sup>-1</sup> ) | $R^2$ |
|------------------------------------------------------------------|-------------------------------------|-------|
| nZVI                                                             | 0.13 ± 0.008                        | 0.98  |
| S-nZVI <sup>S-0.015</sup>                                        | 0.27 ± 0.015                        | 0.99  |
| S-nZVI <sup>S-0.025</sup>                                        | 1.19 ± 0.071                        | 0.98  |
| S-nZVI <sup>S-0.05</sup>                                         | 0.74 ± 0.066                        | 0.96  |
| S-nZVI <sup>S-0.1</sup>                                          | 0.13 ± 0.023                        | 0.86  |
| S-nZVI <sup>S-0.25</sup>                                         | 0.01 ± 0.0002                       | 0.99  |
| S-nZVI <sup>Na<sub>2</sub>S<sub>2</sub>O<sub>4</sub>-0.015</sup> | 0.04 ± 0.003                        | 0.97  |
| S-nZVI <sup>Na<sub>2</sub>S<sub>2</sub>O<sub>4</sub>-0.025</sup> | 0.03 ± 0.001                        | 0.99  |
| S-nZVI <sup>Na<sub>2</sub>S<sub>2</sub>O<sub>4</sub>-0.05</sup>  | 0.01 ± 0.002                        | 0.85  |
| S-nZVI <sup>Na<sub>2</sub>S<sub>2</sub>O<sub>4</sub>-0.1</sup>   | 0.02 ± 0.0009                       | 0.99  |
| S-nZVI <sup>Na<sub>2</sub>S<sub>2</sub>O<sub>4</sub>-0.5</sup>   | 0.38 ± 0.02                         | 0.99  |
| S-nZVI <sup>Na<sub>2</sub>S<sub>2</sub>O<sub>4</sub>-0.75</sup>  | 0.30 ± 0.03                         | 0.98  |
| S-nZVI <sup>Na<sub>2</sub>S-0.015</sup>                          | 0.11 ± 0.006                        | 0.99  |
| S-nZVI <sup>Na<sub>2</sub>S-0.025</sup>                          | 0.16 ± 0.018                        | 0.94  |
| S-nZVI <sup>Na<sub>2</sub>S-0.05</sup>                           | 0.11 ± 0.005                        | 0.99  |
| S-nZVI <sup>Na<sub>2</sub>S-0.1</sup>                            | 0.03 ± 0.003                        | 0.97  |
| S-nZVI <sup>Na<sub>2</sub>S-0.3</sup>                            | 0.05 ± 0.002                        | 0.99  |
| S-nZVI <sup>Na<sub>2</sub>S-0.5</sup>                            | 0.01 ± 0.007                        | 0.14  |
| S - nZVI <sup>S - 0.025</sup> <sub>P</sub>                       | 0.047 ± 0.002                       | 0.99  |
| S - nZVI <sup>S - 0.025</sup> <sub>G</sub>                       | 0.046 ± 0.002                       | 0.99  |
| S - nZVI <sup>S - 0.025</sup> <sub>T</sub>                       | 0.037 ± 0.0008                      | 0.99  |

**Table S10.** Physicochemical properties of water samples.

| Physicochemical property        | Unit                  | Ultrapure water | Tap water | Groundwater | Pearl River |
|---------------------------------|-----------------------|-----------------|-----------|-------------|-------------|
| pH                              | -                     | 6.86            | 6.57      | 5.75        | 6.83        |
| Conductivity                    | $\mu\text{S cm}^{-1}$ | 0.76            | 123.4     | 161.9       | 171.0       |
| Na <sup>+</sup>                 | mg L <sup>-1</sup>    | 0               | 0.16      | 0.18        | 0.13        |
| K <sup>+</sup>                  | mg L <sup>-1</sup>    | 0               | 0.004     | 0.01        | 0.02        |
| Mg <sup>2+</sup>                | mg L <sup>-1</sup>    | 0               | 0.08      | 0.09        | 0.09        |
| Ca <sup>2+</sup>                | mg L <sup>-1</sup>    | 0               | 0.20      | 0.24        | 0.39        |
| F <sup>-</sup>                  | mg L <sup>-1</sup>    | 0.16            | 1.09      | 1.82        | 1.61        |
| Cl <sup>-</sup>                 | mg L <sup>-1</sup>    | 0.1             | 19.29     | 41.84       | 14.52       |
| NO <sub>2</sub> <sup>-</sup>    | mg L <sup>-1</sup>    | 0               | 0.2       | 0.21        | 0.45        |
| Br <sup>-</sup>                 | mg L <sup>-1</sup>    | 0               | 0         | 0.04        | 0           |
| NO <sub>3</sub> <sup>-</sup>    | mg L <sup>-1</sup>    | 0.09            | 3.94      | 9.43        | 5.52        |
| SO <sub>4</sub> <sup>-</sup>    | mg L <sup>-1</sup>    | 0.25            | 8.36      | 7.20        | 19.19       |
| NH <sub>4</sub> <sup>+</sup> -N | mg L <sup>-1</sup>    | 0               | 0         | 0           | 1.83        |
| TN                              | mg L <sup>-1</sup>    | 0               | 4.21      | 9.64        | 7.8         |
| TP                              | mg L <sup>-1</sup>    | 0               | 0         | 0           | 0.23        |
| BOD <sub>5</sub>                | mg L <sup>-1</sup>    | 0               | 0         | 0           | 3           |
| COD                             | mg L <sup>-1</sup>    | 0               | 3.95      | 6.32        | 18.57       |

## References

1. S. R. Rajajayavel and S. Ghoshal, Enhanced reductive dechlorination of trichloroethylene by sulfidated nanoscale zerovalent iron, *Water Res.*, 2015, **78**, 144-53, DOI: 10.1016/j.watres.2015.04.009.
2. Y. M. Su, A. S. Adeleye, A. A. Keller, Y. X. Huang, C. M. Dai, X. F. Zhou and Y. L. Zhang, Magnetic sulfide-modified nanoscale zerovalent iron (S-nZVI) for dissolved metal ion removal, *Water Res.*, 2015, **74**, 47-57, DOI: <http://dx.doi.org/10.1016/j.watres.2015.02.004>.
3. D. Fan, R. P. Anitori, B. M. Tebo, P. G. Tratnyek, J. S. Lezama Pacheco, R. K. Kukkadapu, M. H. Engelhard, M. E. Bowden, L. Kovarik and B. W. Arey, Reductive sequestration of pertechnetate ( $^{99}\text{TcO}_4^-$ ) by nano zerovalent iron (nZVI) transformed by abiotic sulfide, *Environ. Sci. Technol.*, 2013, **47**, 5302-10, DOI: 10.1021/es304829z.
4. H. Qin, X. H. Guan, J. Z. Bandstra, R. L. Johnson and P. G. Tratnyek, Modeling the kinetics of hydrogen formation by zerovalent iron: Effects of sulfidation on micro- and nano-scale particles, *Environ. Sci. Technol.*, 2018, **52**, 13887-13896, DOI: 10.1021/acs.est.8b04436.
